# Supplementary material for: Spatial-Temporal Variation in Health Impact Attributable to PM2.5 and Ozone Pollution in the Beijing Metropolitan Region of China
Source: MDPI journal article supplement (doi:10.3390/atmos13111813), 2022-10-31
Supplement: s1 [file s1]

# Supplementary Materials: Spatial-Temporal Variation in Health Impact Attributable to PM<sub>2.5</sub> and Ozone Pollution in the Beijing Metropolitan Region of China

Mingqun Huo <sup>1,2,\*</sup>, Ken Yamashita <sup>1,2</sup>, Fang Chen <sup>1</sup> and Keiichi Sato <sup>1,2</sup>

<sup>1</sup>. Asia Center for Air Pollution Research (ACAP), Niigata 950-2144, Japan

<sup>2</sup>. Graduate School of Science and Technology, Niigata University, Niigata 950-2181, Japan

\* Correspondence: mqhuo@acap.asia; Tel.: +81-25-263-0558

**Citation:** Huo, M.; Yamashita, K.; Chen, F.; Sato, K. Spatial-Temporal Variation in Health Impact Attributable to PM<sub>2.5</sub> and Ozone Pollution in the Beijing Metropolitan Region of China. *Atmosphere* **2022**, *13*, 1813.  
<https://doi.org/10.3390/1813>

Academic Editor(s): Michele Stortini, Grazia Ghermandi

Received: 23 September 2022

Accepted: 25 October 2022

Published: 31 October 2022

**Publisher's Note:** MDPI stays neutral with regard to jurisdictional claims in published maps and institutional affiliations.

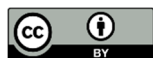

**Copyright:** © 2022 by the authors. Submitted for possible open access publication under the terms and conditions of the Creative Commons Attribution (CC BY) license (<https://creativecommons.org/licenses/by/4.0/>).

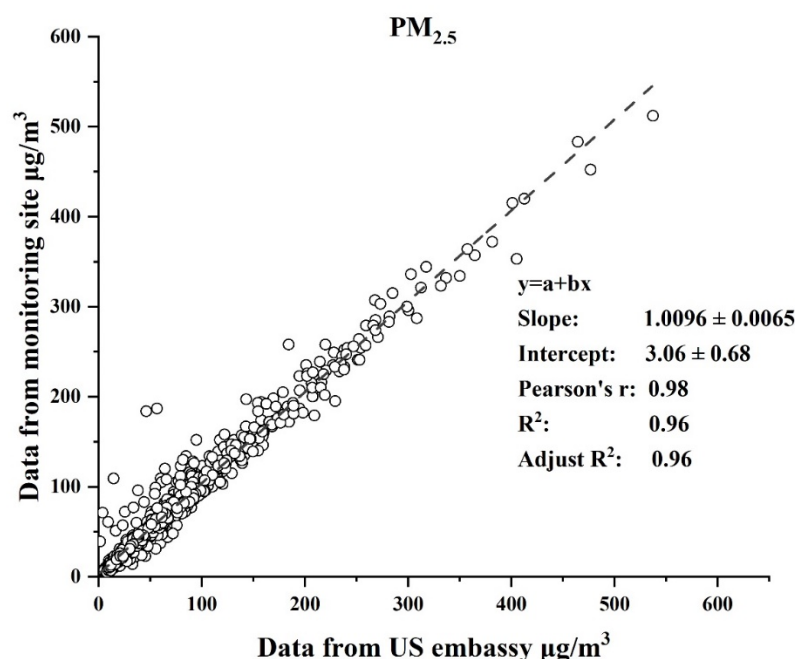

**Figure S1.** The correlation analysis between daily PM<sub>2.5</sub> concentration observed from US embassy and the nearest monitoring site (Nongzhanguan site) in Beijing from 2015 to 2017.

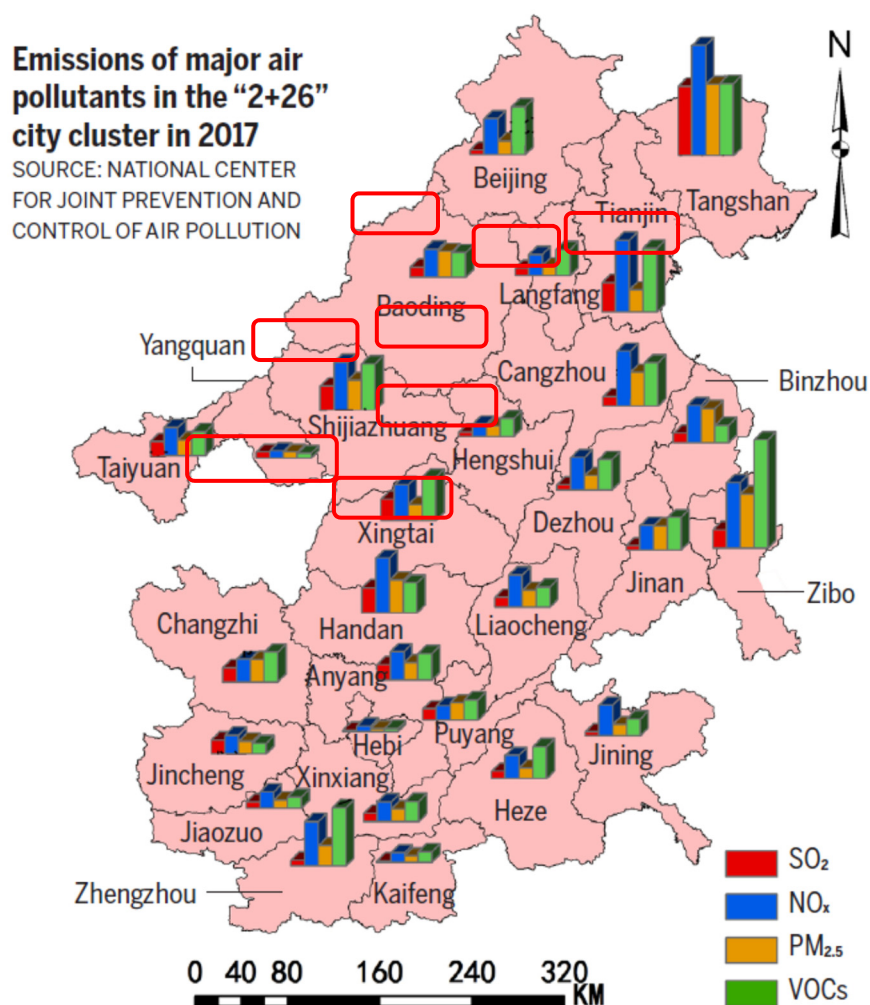

**Figure S2.** Emissions of major air pollutants in the study area. Source: National Center for Joint Prevention and Control of Air Pollution, China. Note: The city in the red box is included the Beijing-Tianjin-Hebei region.

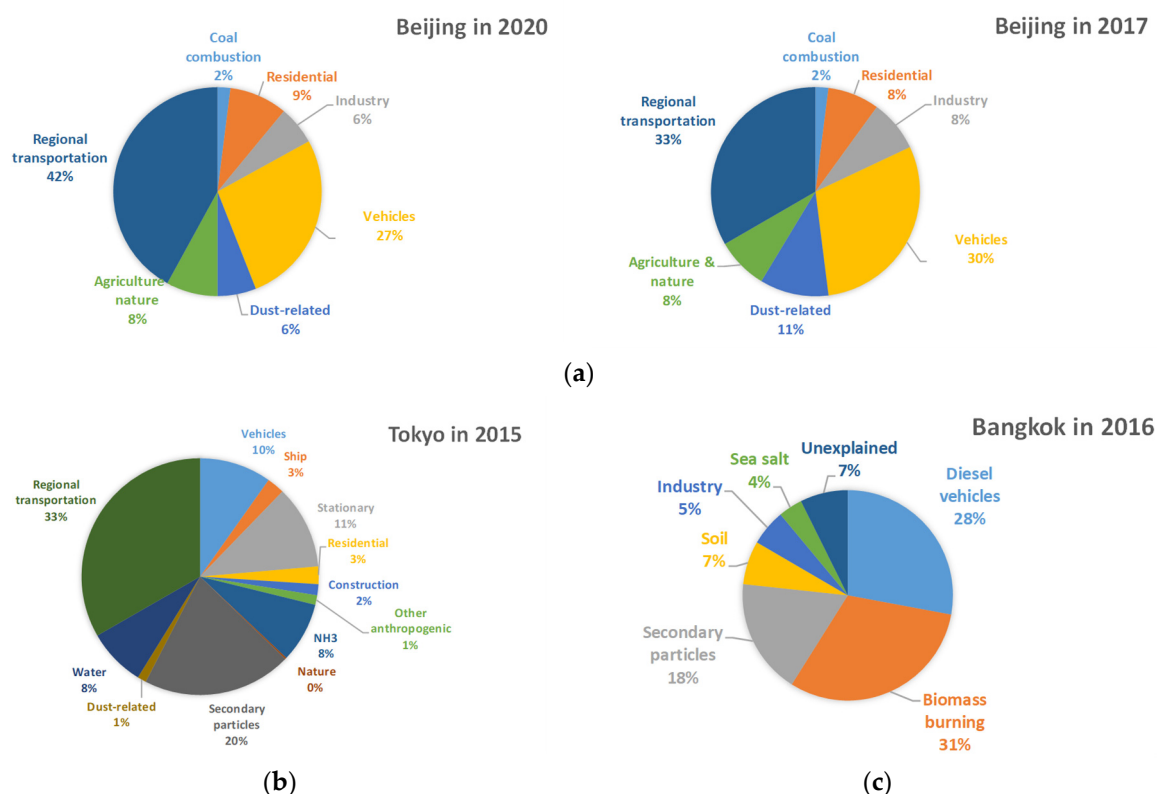

**Figure S3.** The source apportionment results from the cities in East Asia. Source: (a) Report of PM<sub>2.5</sub> source apportionment project by Beijing Municipal Ecology and Environment Bureau; (b) Report of results of PM<sub>2.5</sub> source apportionments in Tokyo by Ministry of Environment Japan; (c) Final report on “A Study in Urban Air Pollution Improvement in Asia” by the Japan International Cooperation Agency (JICA).

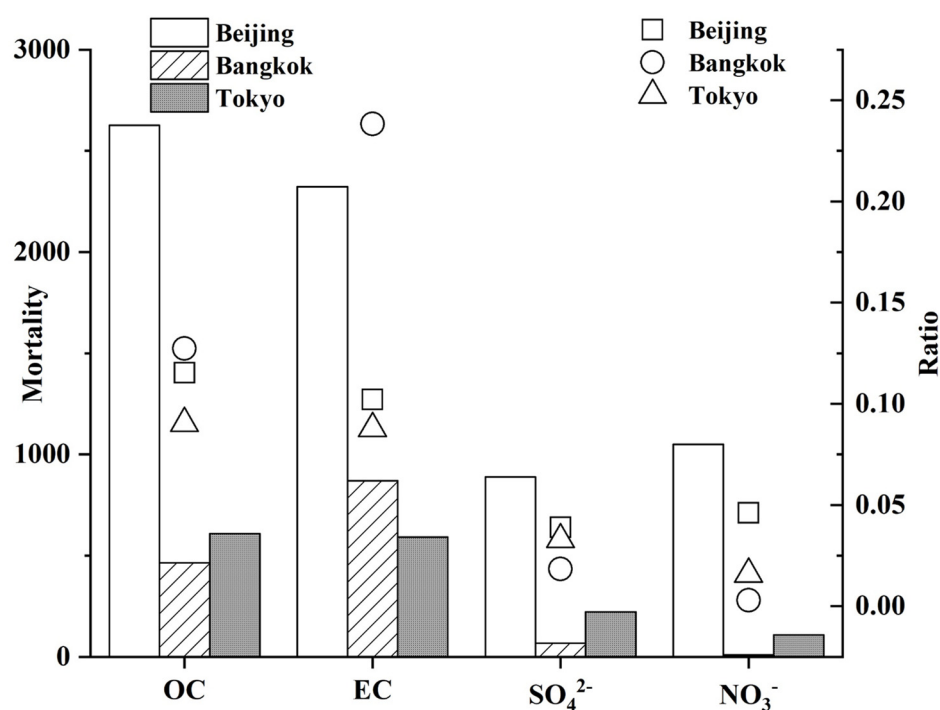

**Figure S4.** Mortality attributable to PM<sub>2.5</sub> compositions (left axis) and the ratio of mortality attributable to PM<sub>2.5</sub> compositions to the mortality attributable to PM<sub>2.5</sub> (right axis) among Beijing, Tokyo and Bangkok.

**Table S1.** Population (10<sup>4</sup>) and Death rate (‰) at Beijing City, Tianjin City, and Hebei Province.

| Beijing    |            |      | Tianjin    |            | Hebei      |            | Tokyo      |            | Bangkok    |            |
|------------|------------|------|------------|------------|------------|------------|------------|------------|------------|------------|
| population | death rate |      | population | death rate |
| 2013       | 2125       | 4.50 | 1410       | 6.00       | 7288       | 6.87       |            |            |            |            |
| 2014       | 2171       | 4.89 | 1429       | 6.05       | 7323       | 6.23       |            |            |            |            |
| 2015       | 2188       | 4.91 | 1439       | 5.61       | 7345       | 5.79       | 1352       | 8.5        |            |            |
| 2016       | 2195       | 5.16 | 1443       | 5.54       | 7375       | 6.36       |            |            | 569        | 7.8        |
| 2017       | 2194       | 5.24 | 1410       | 5.05       | 7409       | 6.60       |            |            |            |            |
| 2018       | 2192       | 5.50 | 1383       | 5.42       | 7426       | 6.38       |            |            |            |            |
| 2019       | 2190       | 5.40 | 1385       | 5.30       | 7447       | 6.12       |            |            |            |            |
| 2020       | 2189       | 4.59 | 1387       | 5.92       | 7464       | 5.65       |            |            |            |            |

**Table S2.** Data sources of PM<sub>2.5</sub> compositions (particulate OC, EC, SO<sub>4</sub><sup>2-</sup> and NO<sub>3</sub><sup>-</sup>) at Beijing since 2013 to 2020.

| City              | Year | Parameters                                                             | Reference                |
|-------------------|------|------------------------------------------------------------------------|--------------------------|
| Beijing, China    | 2013 | OC, EC, SO <sub>4</sub> <sup>2-</sup> and NO <sub>3</sub> <sup>-</sup> | Ji et al., 2019 [20]     |
|                   |      |                                                                        | Want et al., 2019 [21]   |
|                   | 2014 | OC, EC, SO <sub>4</sub> <sup>2-</sup> and NO <sub>3</sub> <sup>-</sup> | Ding et al., 2017 [23]   |
|                   | 2015 | SO <sub>4</sub> <sup>2-</sup> and NO <sub>3</sub> <sup>-</sup>         | Ding et al., 2017 [23]   |
|                   | 2016 | SO <sub>4</sub> <sup>2-</sup> and NO <sub>3</sub> <sup>-</sup>         | Jia et al., 2018 [22]    |
|                   | 2017 | OC, EC, SO <sub>4</sub> <sup>2-</sup> and NO <sub>3</sub> <sup>-</sup> | Want et al., 2019 [21]   |
|                   | 2018 | OC and EC                                                              | Huang et al., 2021 [18]  |
|                   | 2019 | OC, EC, SO <sub>4</sub> <sup>2-</sup> and NO <sub>3</sub> <sup>-</sup> | Luo et al., 2021 [19]    |
| Tokyo, Japan      | 2015 | OC, EC, SO <sub>4</sub> <sup>2-</sup> and NO <sub>3</sub> <sup>-</sup> | Website of MOEJ          |
| Bangkok, Thailand | 2016 | OC, EC, SO <sub>4</sub> <sup>2-</sup> and NO <sub>3</sub> <sup>-</sup> | JICA report [24]         |
|                   |      |                                                                        | Narita et al., 2019 [25] |

MOEJ: Ministry of Environment, Japan (<https://www.env.go.jp/air/osen/pm/monitoring.html> accessed on 1 June 2022).

**Table S3.** Estimates for extra risk values (ER) and 95% confidence intervals (95% CI) of all-cause mortality attribute to PM<sub>2.5</sub> and ozone.

| Air pollutant                                      | ER and (95% CI)                                                         | References                  |
|----------------------------------------------------|-------------------------------------------------------------------------|-----------------------------|
| PM <sub>2.5</sub>                                  | $3.8 \times 10^{-3}$ ( $3.10 \times 10^{-3}$ , $4.50 \times 10^{-3}$ )  | Shang et al., 2013 [29]     |
| OC in PM <sub>2.5</sub>                            | $2.1 \times 10^{-3}$ ( $0.73 \times 10^{-3}$ , $3.47 \times 10^{-3}$ )  | Achilleos et al., 2018 [30] |
| EC in PM <sub>2.5</sub>                            | $6.0 \times 10^{-3}$ ( $2.28 \times 10^{-3}$ , $9.72 \times 10^{-3}$ )  | Achilleos et al., 2018 [30] |
| SO <sub>4</sub> <sup>2-</sup> in PM <sub>2.5</sub> | $8.0 \times 10^{-4}$ ( $4.08 \times 10^{-4}$ , $1.19 \times 10^{-3}$ )  | Achilleos et al., 2018 [30] |
| NO <sub>3</sub> <sup>-</sup> in PM <sub>2.5</sub>  | $7.0 \times 10^{-4}$ ( $-8.40 \times 10^{-5}$ , $1.48 \times 10^{-3}$ ) | Achilleos et al., 2018 [30] |
| Ozone                                              | $3.0 \times 10^{-3}$ ( $1.00 \times 10^{-3}$ , $4.00 \times 10^{-3}$ )  | WHO 2008 [31]               |
